# Supplementary material for: Salamanders and other amphibians are aglow with biofluorescence
Source: PubMed Central journal article supplement (PMC7046780; doi:10.1038/s41598-020-59528-9), 2020-02-27

**Supplementary figures and tables for:**

**Salamanders and other amphibians are aglow with biofluorescence**

Jennifer Y. Lamb<sup>1\*</sup> and Matthew P. Davis<sup>1\*</sup>.

<sup>1</sup>St. Cloud State University, Department of Biology, St. Cloud, Minnesota 56301, USA.

\* corresponding authors: [jylamb@stcloudstate.edu](mailto:jylamb@stcloudstate.edu); [mpdavis@stcloudstate.edu](mailto:mpdavis@stcloudstate.edu)

**Supplementary Table 1. Species of amphibians surveyed for biofluorescence in response to blue excitation wavelengths.** We observed biofluorescence across all 32 species of amphibians we tested. Our survey included eight families of salamanders, five families of frogs, and one family of caecilian. We were not able to survey the larval forms for each of these species but did confirm that the larvae of six species also fluoresced. The number of individuals indicated is the number of individuals tested for fluorescence when exposed to blue excitation light (440 – 460 nm).

| Amphibian Clade | Family           | Genus                  | Species                    | Common Name                   | Fluorescence | Life-history Stage     | Number of Individuals |
|-----------------|------------------|------------------------|----------------------------|-------------------------------|--------------|------------------------|-----------------------|
| Anura           | Bufo             | <i>Anaxyrus</i>        | <i>americanus</i>          | American toad                 | Present      | Metamorphosed          | 2                     |
| Anura           | Bufo             | <i>Anaxyrus</i>        | <i>fowleri</i>             | Fowler's toad                 | Present      | Metamorphosed          | 1                     |
| Anura           | Bufo             | <i>Anaxyrus</i>        | <i>terrestris</i>          | Southern toad                 | Present      | Metamorphosed          | 1                     |
| Anura           | Ceratophryidae   | <i>Ceratophrys</i>     | <i>cranwelli</i>           | Green pac-man frog            | Present      | Metamorphosed          | 1                     |
| Anura           | Dendrobatiidae   | <i>Epipedobates</i>    | <i>anthonyi</i>            | Phantasmal dart frog          | Present      | Metamorphosed          | 1                     |
| Anura           | Hylidae          | <i>Cruxiolhyla</i>     | <i>craspedopus</i>         | Fringe leaf frog              | Present      | Metamorphosed          | 2                     |
| Anura           | Hylidae          | <i>Hyla</i>            | <i>chrysofelis</i> complex | Gray treefrog complex         | Present      | Larvae & metamorphosed | 2                     |
| Anura           | Hylidae          | <i>Pseudacris</i>      | <i>maculata</i>            | Boreal chorus frog            | Present      | Metamorphosed          | 2                     |
| Anura           | Hylidae          | <i>Trachycephalus</i>  | <i>resinifictrix</i>       | Amazon milk frog              | Present      | Metamorphosed          | 1                     |
| Anura           | Ranidae          | <i>Lithobates</i>      | <i>pipiens</i>             | Northern leopard frog         | Present      | Larvae & metamorphosed | 1                     |
| Anura           | Ranidae          | <i>Lithobates</i>      | <i>sylvaticus</i>          | Wood frog                     | Present      | Metamorphosed          | 2                     |
| Caudata         | Ambystomatidae   | <i>Ambystoma</i>       | <i>laterale</i>            | Blue-spotted salamander       | Present      | Larvae & metamorphosed | 2                     |
| Caudata         | Ambystomatidae   | <i>Ambystoma</i>       | <i>maculatum</i>           | Spotted salamander            | Present      | Metamorphosed          | 1                     |
| Caudata         | Ambystomatidae   | <i>Ambystoma</i>       | <i>opacum</i>              | Marbled salamander            | Present      | Metamorphosed          | 1                     |
| Caudata         | Ambystomatidae   | <i>Ambystoma</i>       | <i>tigrinum</i>            | Eastern tiger salamander      | Present      | Larvae & metamorphosed | 2                     |
| Caudata         | Amphiumidae      | <i>Amphiuma</i>        | <i>tridactylum</i>         | Three-toed amphiuma           | Present      | Metamorphosed          | 1                     |
| Caudata         | Cryptobranchidae | <i>Cryptobranchus</i>  | <i>alleganiensis</i>       | Hellbender                    | Present      | Metamorphosed          | 1                     |
| Caudata         | Dicamptodontidae | <i>Dicamptodon</i>     | <i>ensatus</i>             | California giant salamander   | Present      | Metamorphosed          | 1                     |
| Caudata         | Plethodontidae   | <i>Desmognathus</i>    | <i>conanti</i>             | Spotted dusky salamander      | Present      | Metamorphosed          | 2                     |
| Caudata         | Plethodontidae   | <i>Eurycea</i>         | <i>cirrigera</i>           | Southern two-lined salamander | Present      | Larvae                 | 2                     |
| Caudata         | Plethodontidae   | <i>Eurycea</i>         | <i>guttolineata</i>        | Three lined salamander        | Present      | Metamorphosed          | 2                     |
| Caudata         | Plethodontidae   | <i>Eurycea</i>         | <i>longicauda</i>          | Long tailed salamander        | Present      | Metamorphosed          | 2                     |
| Caudata         | Plethodontidae   | <i>Hemidactylium</i>   | <i>scutatum</i>            | Four toed salamander          | Present      | Metamorphosed          | 1                     |
| Caudata         | Plethodontidae   | <i>Plethodon</i>       | <i>glutinosus</i>          | Slimy salamander              | Present      | Metamorphosed          | 1                     |
| Caudata         | Proteidae        | <i>Necturus</i>        | <i>beyeri</i>              | Gulf Coast waterdog           | Present      | Larvae                 | 2                     |
| Caudata         | Salamandridae    | <i>Cynops</i>          | <i>orientalis</i>          | Chinese fire-belly newt       | Present      | Metamorphosed          | 2                     |
| Caudata         | Salamandridae    | <i>Ichthyosaura</i>    | <i>alpestris</i>           | Alpine newt                   | Present      | Metamorphosed          | 1                     |
| Caudata         | Salamandridae    | <i>Notophthalmus</i>   | <i>viridescens</i>         | Central newt                  | Present      | Metamorphosed          | 5                     |
| Caudata         | Salamandridae    | <i>Triturus</i>        | <i>karelinii</i>           | Southern crested newt         | Present      | Metamorphosed          | 1                     |
| Caudata         | Sirenidae        | <i>Pseudobranchius</i> | <i>striatus</i>            | Northern dwarf siren          | Present      | Metamorphosed          | 2                     |
| Caudata         | Sirenidae        | <i>Siren</i>           | <i>intermedia</i>          | Lesser siren                  | Present      | Metamorphosed          | 1                     |
| Gymnophiona     | Typhlonectidae   | <i>Typhlonectes</i>    | <i>natans</i>              | Rio Cauca caecilian           | Present      | Metamorphosed          | 1                     |

**Supplementary Figure 1. Phylogenetic relationships among Amphibians from Pyron and Weins (2011) with an emphasis on Caudata (salamanders).** The evolutionary relationships for Apoda and Anura are trimmed to a single representative. Taxa within Caudata are trimmed to a representative for each genus, with genera that have been confirmed to be biofluorescent in response to blue excitation wavelengths (440 – 460 nm) (Supplementary Table 1) indicated in green. Terminals and branches indicated in white have unknown biofluorescent properties.

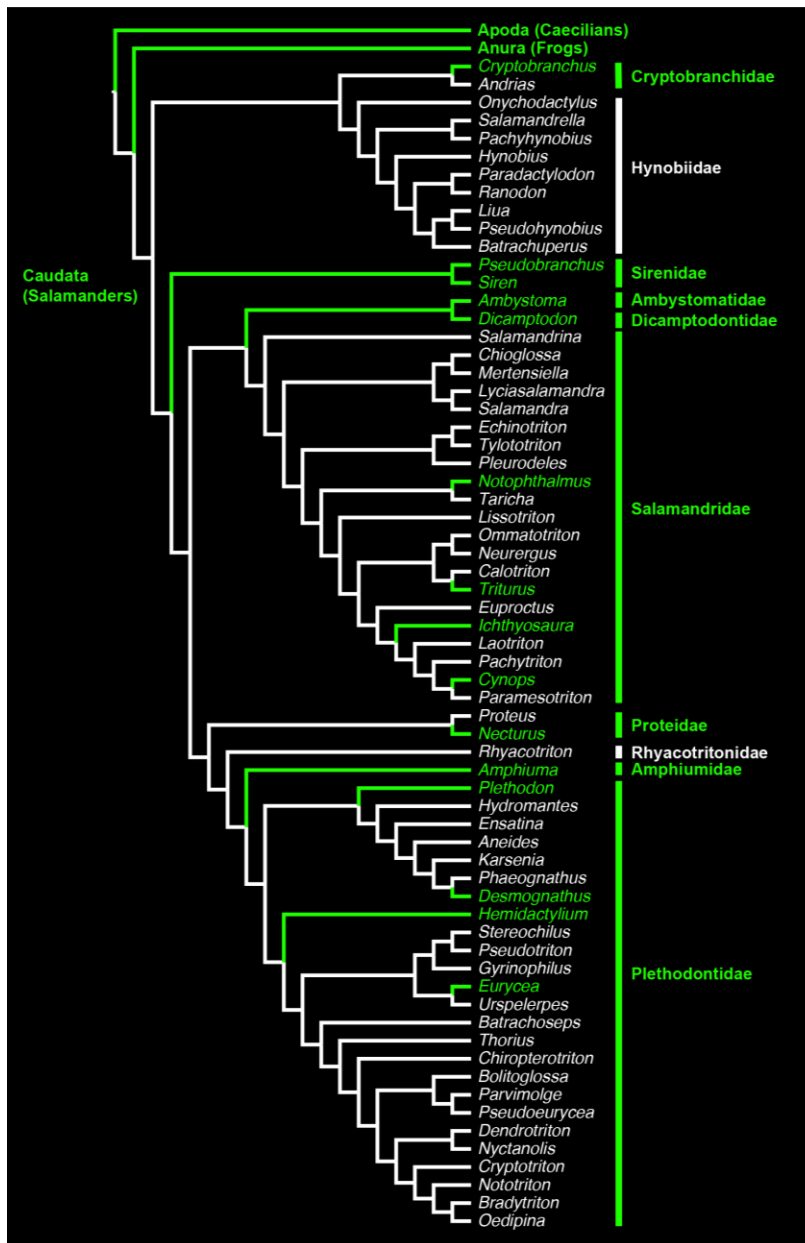

**Supplementary Figure 2. Biofluorescent patterns in response to ultra-violet radiation.**

Imaged are a section of the dorsal surface of an eastern tiger salamander (*Ambystoma tigrinum*) and the posterior dorsal surface of an anuran (*Ceratophrys cranwelli*) fluorescing in response to ultra-violet excitation light. The excitation light used was 360 – 380 nm and we visualized fluorescence via a long pass filter (415 nm). Fluorescence in response to ultra violet light was not as intense as was fluorescence in response to blue light (440 – 460 nm).

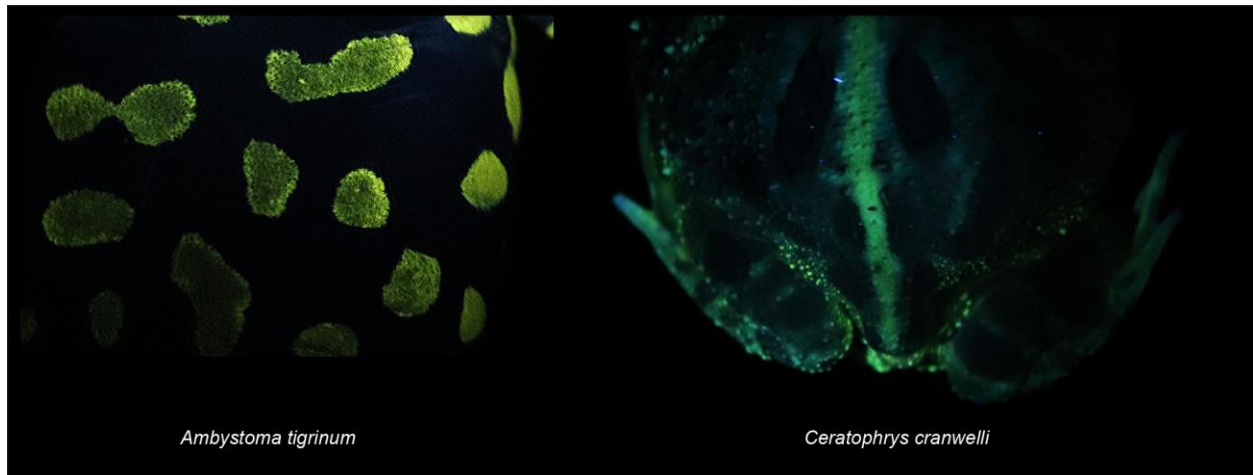

**Supplementary Figure 3. Biofluorescent mucous-like secretions and urine.** We observed that the secretions or other products of some amphibians biofluoresced in response to blue excitation light (440 – 460 nm). Pictured on the left is the mucous-like secretion from a caecilian (*Typhlonectes*) under white light (top) and then imaged via a blue excitation light and yellow long pass filter (500 nm) (bottom). On the right is a giant salamander (*Dictamptodon*) and its urine imaged with blue excitation light and a yellow long pass filter.

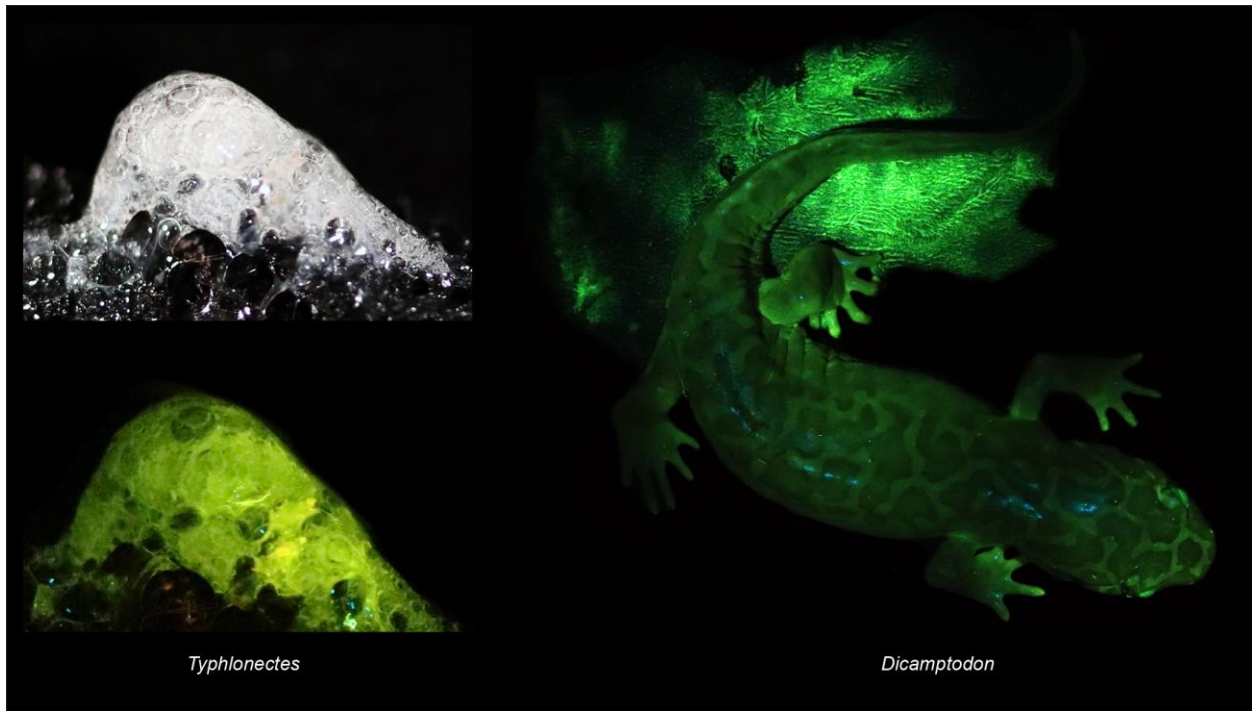

Supplement: 41598_2020_59528_MOESM1_ESM.pdf [file 41598_2020_59528_MOESM1_ESM.pdf]
